# Supplementary material for: Health literacy interventions for secondary prevention of coronary artery disease: a scoping review
Source: HighWire-hosted journal article supplement (doi:10.1136/openhrt-2021-001895), 2022-01-01
Supplement: openhrt-2021-001895supp001_data_supplement.pdf [file openhrt-2021-001895supp001_data_supplement.pdf]

**Supplementary File 1:** Full electronic search strategy (Ovid MEDLINE)

| Search number | PICOS element | Sub-category               | Search terms (in title/abstract)                                                                                                                                                                                                                                                                                                                                                                                                                                                                            |
|---------------|---------------|----------------------------|-------------------------------------------------------------------------------------------------------------------------------------------------------------------------------------------------------------------------------------------------------------------------------------------------------------------------------------------------------------------------------------------------------------------------------------------------------------------------------------------------------------|
| #1            | Population    | Coronary heart disease     | cardiovascular disease OR CVD OR heart OR cardiac OR coronary artery disease OR coronary heart disease OR coronary artery disease OR AMI OR myocardial infarction OR ACS OR acute coronary syndrome OR STEMI                                                                                                                                                                                                                                                                                                |
|               |               | Excluded health conditions | NOT (primary prevention OR diabetes OR chronic heart failure OR CHF OR heart failure OR children OR cancer OR HIV OR AIDS OR acquired human immunodeficiency syndrome OR human immunodeficiency virus)                                                                                                                                                                                                                                                                                                      |
| #2            | Intervention  | Health literacy            | patient education OR health education OR health knowledge OR health attitudes OR health practice OR health literacy OR ehealth literacy OR e-health literacy OR functional health literacy OR interactive health literacy OR critical health literacy OR literacy OR numeracy OR HLQ OR Health Literacy Questionnaire OR HLS-EU OR REALM OR TOFHLA OR S-TOFHLA OR AAHLS OR Newest Vital Sign OR Brief Health Literacy Screener OR single item screener OR Health literacy scale OR CAHPS OR eHEALS OR HeLMS |
|               |               | Social peer support        | OR peer support OR social support OR support group OR peer support groups OR mutual support groups OR self-help groups OR social networks OR social networking OR social networking sites OR social media                                                                                                                                                                                                                                                                                                   |

|  |  |                                  |                                                                                                                                                                                                                                                                                                                                                                                                                                                                                                                                                                                                      |
|--|--|----------------------------------|------------------------------------------------------------------------------------------------------------------------------------------------------------------------------------------------------------------------------------------------------------------------------------------------------------------------------------------------------------------------------------------------------------------------------------------------------------------------------------------------------------------------------------------------------------------------------------------------------|
|  |  | Empowerment                      | OR motivational interviewing OR MI OR motivational interview OR behaviour change intervention OR behavior change intervention OR goal setting OR capacity building OR patient empowerment OR patient participation OR patient involvement OR patient engagement                                                                                                                                                                                                                                                                                                                                      |
|  |  | Patient provider communication   | OR patient provider communication OR patient clinician communication OR teach-back OR “Show-me” OR “Closing the loop” OR “Closing the cycle” OR “Ask-tell-ask” OR “Repeat back” OR “Verbal exchange” OR patient provider relationship                                                                                                                                                                                                                                                                                                                                                                |
|  |  | Health literacy of professionals | OR clinician health literacy OR clinician health literacy capacity OR clinician health literacy responsiveness OR health professional health literacy                                                                                                                                                                                                                                                                                                                                                                                                                                                |
|  |  | Reduction in access barriers     | OR access to health care OR access to healthcare OR access to care OR accessibility OR interpreters in healthcare OR interpreter OR translator OR interpretation OR patient navigators OR organisation health literacy OR organization health literacy OR organisational health literacy OR organizational health literacy OR organisation health literacy responsiveness OR organization health literacy responsiveness OR care coordination OR case management OR organisational policies and practices OR organizational policies and practices OR organisational policy OR organizational policy |

|    |            |  |                                                                                                                                                                                                                                                                             |
|----|------------|--|-----------------------------------------------------------------------------------------------------------------------------------------------------------------------------------------------------------------------------------------------------------------------------|
| #3 | Study type |  | intervention OR randomised controlled trials OR randomized controlled trials OR quasi-randomised controlled OR quasi-randomized controlled OR non-randomised controlled OR non-randomized controlled OR uncontrolled intervention OR "before and after" OR comparison study |
| #4 |            |  | #1 AND #2 AND #3                                                                                                                                                                                                                                                            |
| #5 |            |  | #4 Limits (01 January 2010 to current)                                                                                                                                                                                                                                      |
